# Supplementary material for: A basal cell defect promotes budding of prostatic intraepithelial neoplasia
Source: Oxford University Press journal article supplement (doi:10.1242/jcs.188177), 2016-01-01
Supplement: jcs188177supp.pdf [file jcs188177supp.pdf]

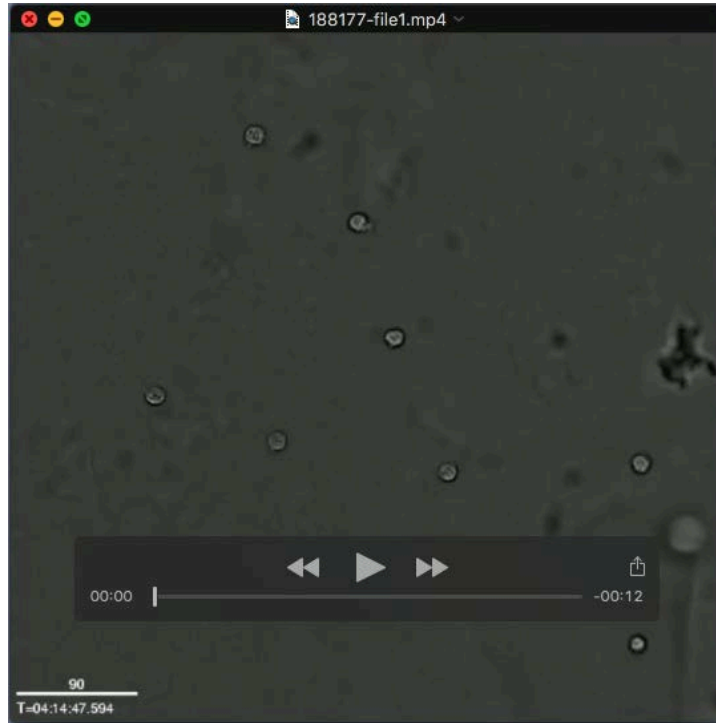

**Supplementary Movie 1. 3D model of PIN arises from single cells.** Movie was taken 2 hours after RWPE-1 cells were seeded on the Matrigel for 64 hrs. Notice that instead of moving into each other, single cells were dividing and rotating to form the structure.

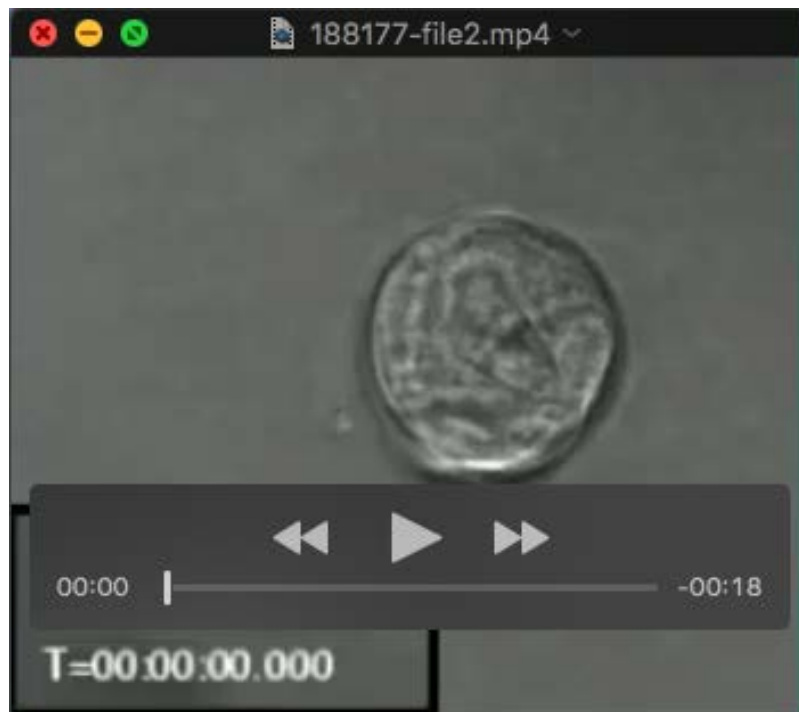

**Supplementary Movie 2. Rotational motion during spheroid formation.** Movie was taken 5 days after RWPE-1 cells seeded in 3D culture for 60 hrs. Notice that the whole spheroid was rotating while the cells were dividing, and the rotation motion stopped approximately at 50 hrs.

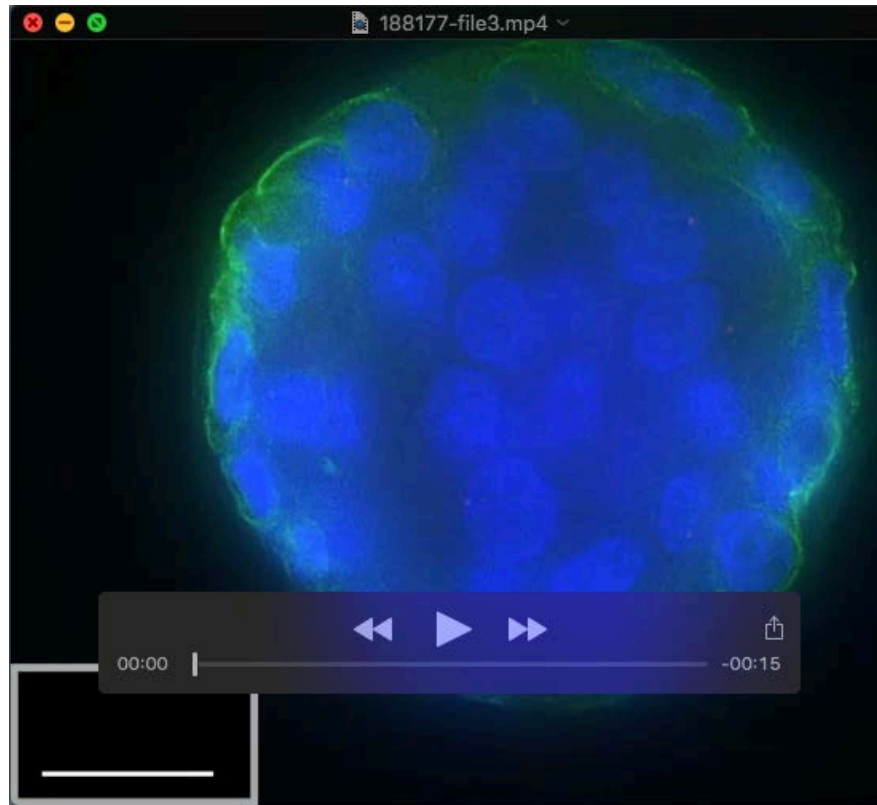

**Supplementary Movie 3. Spindle orientation of the basal cells in spheroid.** Representative Z stack of a day 10 RWPE-1 spheroid immunostained with CEP135 (Red) as a centrosome marker and  $\alpha$ -tubulin (green) with 0.2  $\mu$ m step size. Scale bar = 15  $\mu$ m.

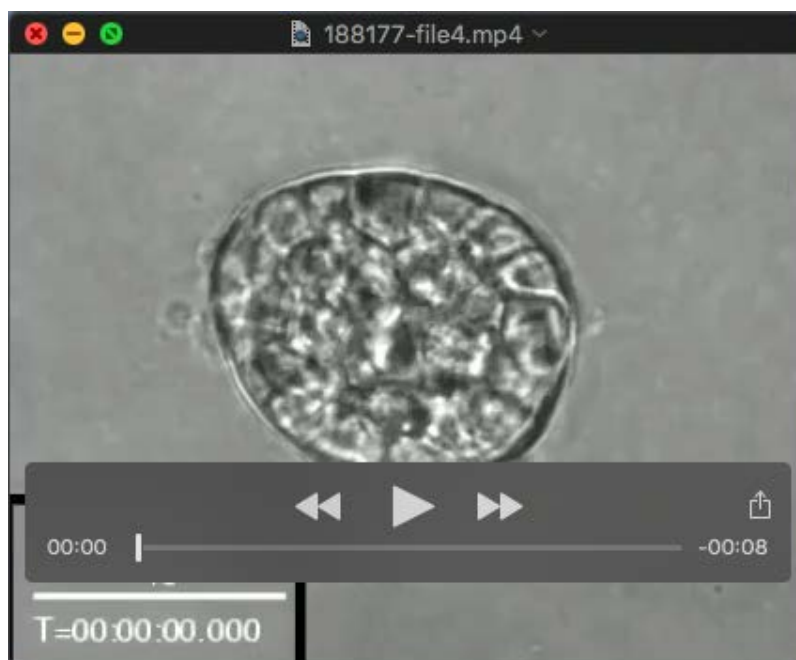

**Supplementary Movie 4. Mature WT RWPE-1 spheroid formation without invasive phenotype.** Movie was taken 12 days after RWPE-1 cells were seeded in 3D culture for 37 hrs.

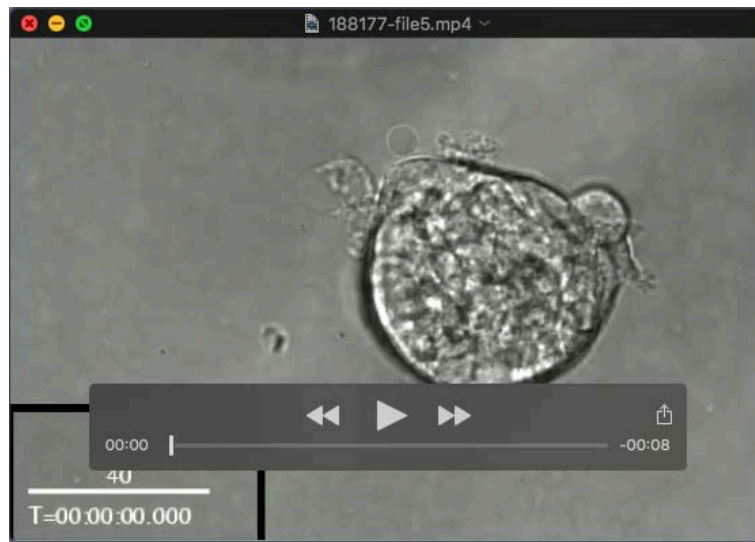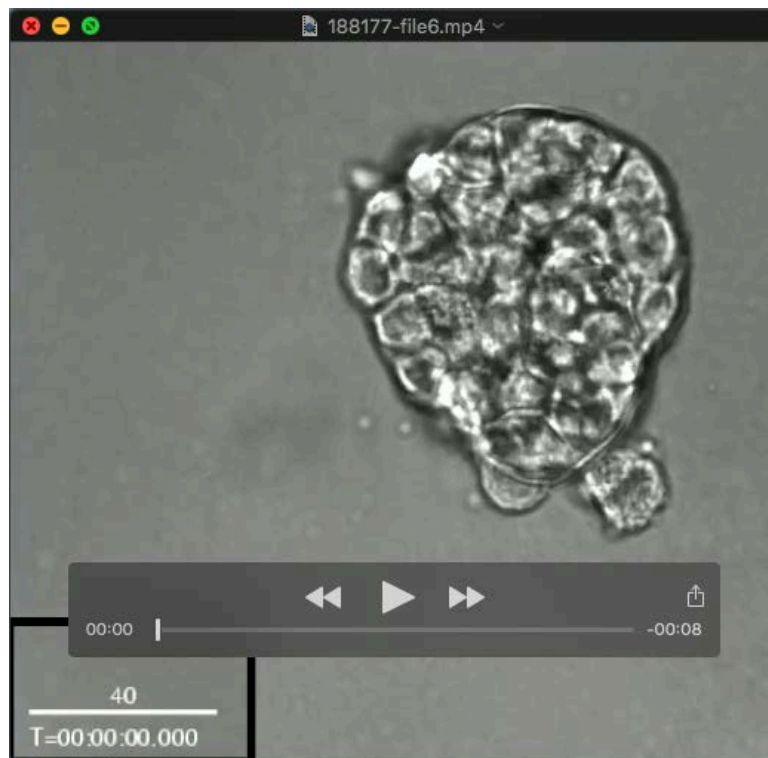

**Supplementary Movie 5, 6. Mature  $\beta 4$  integrin minus RWPE-1 spheroid with cohesive budding.** Movie was taken 12 days after RWPE-1 cells were seeded in 3D culture for 37 hrs.
